# Supplementary material
Source: bioRxiv or medRxiv preprint supplement (https://www.biorxiv.org/content/biorxiv/early/2022/04/10/2022.04.07.487469/DC1/embed/media-1.pdf)
Supplement: Supplementary file [file media-1.pdf]

1 Supplementary Materials for

2  
3 **Genome structures resolve the early diversification of teleost fishes**

4  
5 Elise Parey, Alexandra Louis, Jerome Montfort, Olivier Bouchez, Céline Roques, Carole Iampietro,  
6 Jerome Lluch, Adrien Castinel, Cécile Donnadiou, Thomas Desvignes, Christabel Floi Bucao,  
7 Elodie Jouanno, Ming Wen, Sahar Mejri, Ron Dirks, Hans Jansen, Christiaan Henkel, Wei-Jen  
8 Chen, Margot Zahm, Cédric Cabau, Christophe Klopp, Andrew W. Thompson, Marc Robinson-  
9 Rechavi, Ingo Braasch, Guillaume Lecointre, Julien Bobe, John H. Postlethwait, Camille Berthelot,  
10 Hugues Roest Crollius, Yann Guiguen.

11  
12 Correspondence to: [camille.berthelot@pasteur.fr](mailto:camille.berthelot@pasteur.fr), [hrc@bio.ens.psl.eu](mailto:hrc@bio.ens.psl.eu), [yann.guiguen@inrae.fr](mailto:yann.guiguen@inrae.fr)

13  
14  
15 **This PDF file includes:**

16  
17 Materials and Methods

18 Supplementary Text

19 Figs. S1 to S6

20 Tables S1 to S5

21 References (28–70)

22  
23  
24

## 25 **Materials and Methods**

26

### 27 **Fish sampling**

28

29 Information on the Elopomorpha specimens that were collected for genome sequencing is provided  
30 in table S2.

31

### 32 **High Molecular Weight (HMW) genomic DNA (gDNA) extraction**

33

34 For all Elopomorpha species, HMW gDNA for long-read sequencing was extracted from blood (0.5  
35 ml) sampled with a 10% EDTA (Ethylenediaminetetraacetic acid) coated syringe and directly stored  
36 in 25 ml of a TNES-Urea lysis buffer (TNES-Urea: 4 M urea; 10 mM Tris-HCl, pH 7.5; 125 mM  
37 NaCl; 10 mM EDTA; 1% SDS). HMW gDNA was then extracted from each blood sample in TNES-  
38 urea using a modified phenol/chloroform protocol as previously described (28).

39

### 40 **Genome-wide Chromatin Conformation Capture (Hi-C) sample collection**

41

42 For all Elopomorpha species except *Aldrovandia affinis*, 1.5 ml of blood was sampled with a 10%  
43 EDTA (Ethylenediaminetetraacetic acid) coated syringe and slowly cryopreserved with 15 %  
44 dimethyl sulfoxide (DMSO) for the construction chromosome contact map (Hi-C) libraries.

45

### 46 **RNA-sequencing (RNA-Seq) sample collection and RNA extraction**

47

48 For all Elopomorpha species, except *A. anguilla* in which previous RNA-Seq were publicly available  
49 (29), some of the following organs or tissues: kidney, brain, gills, gonads, liver, fins and skin, were  
50 sampled on freshly euthanized individuals and stored in RNAlater solution or directly snap-frozen in  
51 liquid nitrogen. All samples were kept at -80°C until RNA extraction. Total RNA was extracted using  
52 a modified phenol / chloroform extraction method with Tri Reagent (Euromedex). Frozen tissues or  
53 organs were grinded in 1 ml of Tri Reagent with a Precellys grinder (Precellys Evolution Bertin) in a  
54 2 ml tube containing 28 mm ceramic balls (Ozyme) with the following grinder parameters: 5,800  
55 rpm, 2x30''cycles with a 30''pause. Chloroform (0.2 ml) was then added and mixed with each

56 grinded sample in Tri Reagent solution and centrifuged (12,000 g, 30 min, 4°C) in order to separate  
57 the organic and aqueous phases. The aqueous phase in the supernatant was then recovered and RNAs  
58 were precipitated by adding 0.5 ml of cold isopropanol (-20°C). After 2 hours at -20°C solutions were  
59 centrifuged (12,000 g, 45 min, 4°C) and the supernatant removed. The RNA pellets were washed  
60 twice with 1 ml of 75% ethanol at -20°C followed by centrifugation (12,000 g, 15 min, 4°C). The final  
61 RNA pellets were then dried at room temperature for 5-10 min and resuspended in 10 to 50 µl  
62 nuclease-free water depending on the size of the pellet. RNAs were then stored at -80°C until library  
63 construction.

64

### 65 **Genome sequencing, assembly and annotation**

66

67 Long-read sequencing was carried out in Elopomorpha species using the Oxford Nanopore (ONT)  
68 sequencing technology with the single exception of the Kaup's arrowtooth eel, *Synaphobranchus*  
69 *kaupii* that was sequenced using the PacBio Hifi sequencing technology. HMW gDNA quality and  
70 purity was assessed using spectrophotometry, fluorometry and capillary electrophoresis. Additional  
71 purification steps were performed using AMPure XP beads (Beckman Coulter).

#### 72 Oxford Nanopore (ONT) long-read sequencing

73 All library preparation and sequencing were performed using the Oxford Nanopore Ligation  
74 Sequencing Kit SQK-LSK108 (*A. anguilla*), and SQK-LSK109 according to the manufacturer's  
75 instructions. For each library, 10 µg of DNA was purified then sheared between 20kb to 35kb using  
76 the megaruptor1 system (Diagenode). For *A. anguilla*, DNA was sheared with a G-tube (Covaris), or  
77 not. For some samples a size selection step using the Short Read Eliminator XS Kit (Circulomics)  
78 was performed. Then a one-step DNA-damage repair + END-repair-dA-tail procedure was performed  
79 on 2 µg of DNA. Adapters were ligated to DNAs in the library. Libraries were loaded onto R9.4 (*A.*  
80 *anguilla*), and R9.4.1 flowcells and sequenced on either MinION, GridION or PromethION  
81 instruments for 24h to 72h (see table S3 for details of long read sequencing outputs).

82

#### 83 PacBio Hifi long-read sequencing

84 For *S. kaupii*, libraries preparation and sequencing were performed according to the manufacturer's  
85 instructions "Procedure & Checklist Preparing HiFi SMRTbell Libraries using SMRTbell Express  
86 Template Prep Kit 2.0". Fifteen µg of gDNA was purified then sheared at 20 kb using the megaruptor3  
87 system (Diagenode). Then a single strand overhangs removal and a DNA and END damage repair  
88 step were performed on 10 µg of the sample. Blunt hairpin adapters were ligated to the library. The  
89 library was treated with an exonuclease cocktail to digest unligated DNA fragments. A size selection  
90 step using a 11 kb cutoff was performed on the BluePippin Size Selection system (Sage Science) with  
91 "0.75% DF Marker S1 High Pass 15-20 kb" protocol. Using Binding kit 2.0 kit and sequencing kit  
92 2.0, the primer V2 annealed and polymerase 2.0 bounded library was sequenced by diffusion loading  
93 onto 2 SMRTcells on Sequel2 instrument at 50pM and 60 pM with a 2 hours pre-extension and a 30  
94 hours movie (see table S3 for details of long read sequencing outputs).

95

96 10x Genomics© Linked-Reads

97

98 HMW gDNA quality and purity was assessed using spectrophotometry, fluorometry and capillary  
99 electrophoresis. 10X Chromium Library was prepared according to 10X Genomics protocols from  
100 1.25 ng (*S. kaupii*), 0.625 ng (*Conger conger*, *A. affinis*, *Albula goreensis*, *Megalops atlanticus*) and  
101 0.98 ng (*Gymnothorax javanicus*) of gDNA using the Genome Reagent Kits v2. Library quality was  
102 assessed using capillary electrophoresis and quantified by QPCR using the Kapa Library  
103 Quantification Kit. All species were sequenced on an Illumina HiSeq3000 using a 2x150 pb paired-  
104 end read length except *S. kaupii* that was sequenced on an Illumina HiSeq4000 using a 2x150 pb  
105 paired-end read length.

106

107 Genome-wide Chromatin Conformation Capture (Hi-C) libraries

108

109 For *G. javanicus*, and *A. Anguilla*, Hi-C libraries were prepared according to a protocol adapted from  
110 Foissac and collaborators (30). Briefly, the cryopreserved blood sample was spun down, and the cell  
111 pellet was resuspended and fixed in 1% formaldehyde. Five million cells were processed through  
112 overnight digestion with *HindIII* (NEB), and DNA ends were labeled with Biotin-14-  
113 DCTP (Invitrogen) using the klenow (NEB) and religated. DNA (1.4 g) was sheared to an average  
114 size of 550 bp (Covaris). Biotinylated DNA fragments were pulled down using M280 Streptavidin

115 Dynabeads (Invitrogen) and ligated to PE adaptors (Illumina). Hi-C libraries were then amplified  
116 using PE primers (Illumina) with 10 PCR amplification cycles and each library was sequenced on  
117 either on an Illumina NovaSeq6000 platform for *G. javanicus* or an Illumina HiSeq platform for *A.*  
118 *anguilla* (see table S4 for details of short read sequencing outputs). For *C. conger*, *M. atlanticus*, *A.*  
119 *goreensis*, and *S. kaupii*, Hi-C libraries were processed using the Arima-HiC Kit (San Diego, CA)  
120 according to the manufacturer's instructions and the resulting Hi-C libraries were sequenced on  
121 an Illumina NovaSeq6000 platform. No Hi-C library has been constructed in *A. affinis*, due to the  
122 lack of a cryopreserved blood sample in this deep-sea species.

123

#### 124 RNA-sequencing (RNA-Seq) for genome annotation

125

126 RNA-Seq libraries have been prepared according to Illumina's protocols using the Illumina TruSeq  
127 Stranded mRNA sample prep kit to analyze mRNA. Briefly, mRNA was selected using poly-T beads,  
128 fragmented to generate double stranded cDNA and adaptors were ligated to be sequenced. 11 cycles  
129 of PCR were applied to amplify libraries. Library quality was assessed using a Fragment Analyser  
130 and libraries were quantified by QPCR using the Kapa Library Quantification Kit. RNA-Seq libraries  
131 were sequenced on an Illumina NovaSeq 6000 using a paired-end read length of 2x150 pb with the  
132 Illumina NovaSeq 6000 sequencing kits.

133

#### 134 Genome assembly

135

136 All genomes except those of *A. affinis* and *S. kaupii*, were assembled using the same assembly  
137 procedure described hereafter. Nanopore reads were assembled with wtdbg2 (31) version 2.3 using  
138 standard parameters. Contigs were polished with one round of racon (v.1.3.1) (32), using long reads  
139 aligned with minimap2 (v.2.7) (33) and one round of pilon (v.1.22) (34), using 10X Illumina reads.  
140 These reads were aligned with bwa mem (v.0.7.12-r1039) (35) with standard parameters and the  
141 alignments were compressed, sorted and indexed with samtools (36) view, sort and index v.1.3.1,  
142 using standard parameters. The polished contigs were then scaffolded using Hi-C and 10X as sources  
143 of linking information. 10X reads were aligned using Long Ranger v2.1.1 (10x Genomics) (37). Hi-  
144 C reads were aligned to the draft genome using Juicer (38) with default parameters. A candidate  
145 assembly was then generated with the 3D de novo assembly (3D-DNA) pipeline (39) with the -r 0

146 and --polisher-input-size 100000 parameters. Finally, the candidate assembly was manually reviewed  
147 using the Juicebox assembly tools (40). Because no Hi-C data was available for *A. affinis*, the contigs  
148 were scaffolded using 10X Illumina reads with arcs (v.1.1.1) (41). As *S. kaupii* was sequenced with  
149 HiFi, reads on the PacBio Sequel II were assembled with hifiasm (v.0.9) (42) and the contigs purged  
150 with purge\_dups (v1964aaa). The contigs were not polished before scaffolding using the procedure  
151 described previously.

152

### 153 Genome annotation

154

155 All genomes have been annotated using the same procedure. The first annotation step was to identify  
156 repetitive content using RepeatMasker v4.0.7 (43), Dust v1.0.0 (44) and TRF v4.09 (45). From each  
157 genome, a species-specific de novo repeat library was built with RepeatModeler v1.0.11 and repeated  
158 regions were located using RepeatMasker with the *de novo* and *Danio rerio* libraries. Bedtools  
159 v2.26.0 (46) was used to aggregate repeated regions identified with the three tools and to soft-mask  
160 the genome. The MAKER3 genome annotation pipeline (47) v3.01.02-beta combined annotations  
161 and evidence from three approaches: similarity with fish proteins, assembled transcripts (see below),  
162 and de novo gene predictions. Protein sequences from 11 fish species (*Astyanax mexicanus*, *Danio*  
163 *rerio*, *Gadus morhua*, *Gasterosteus aculeatus*, *Lepisosteus oculatus*, *Oreochromis niloticus*, *Oryzias*  
164 *latipes*, *Poecilia formosa*, *Takifugu rubripes*, *Tetraodon nigroviridis*, *Xiphophorus maculatus*) found  
165 in Ensembl were aligned to the masked genome using Exonerate v2.4 (48) with the alignment model  
166 protein2genome that allows translated alignments with modeling of introns. RNA-Seq were mapped  
167 to the genome using STAR v2.5.1b (49) with outWigType and outWigStrand options to output signal  
168 wiggle files. Cufflinks v2.2.1 (50) was used to assemble the transcripts which were used as RNA-seq  
169 evidence. Braker v2.0.4 (51) provided de novo gene models from wiggle files provided by STAR as  
170 hint files for GeneMark (51) and Augustus (52) training. The best supported transcript for each gene  
171 was chosen using the quality metric called Annotation Edit Distance (AED) (53). Finally, genome  
172 annotation gene completeness was assessed by BUSCO (54) based on orthologs derived from the  
173 Actinopterygii lineage.

174

### 175 Genome-wide phylogenetic gene trees

176

177 In order to extract single-copy orthologous genes to use as phylogenetic markers, we reconstructed a  
178 genome-wide set of gene trees including genes of all 25 selected genomes (see table S4 for species  
179 and genome assembly references). To do so, we used a pipeline similar to the one employed by the  
180 Ensembl Compara database (55). We started by performing an all-against-all BLASTP+ on the set of  
181 proteins derived from the longest transcripts of each genome (56), using the following parameters ‘-  
182 seg no -max\_hsp 1 -use\_sw\_tback -evaluate 1e-5’. From the blast results, we defined gene families  
183 with the clustering algorithm hcluster\_sg, using parameters ‘-m 750 -w 0 -s 0.34 -O’. For each gene  
184 family, we next built a protein multiple alignment using T-Coffee (57), with the command ‘t-coffee  
185 -type=PROTEIN -method mafftgins\_msa, muscle\_msa, kalign\_msa’. We reconstructed gene trees  
186 with TreeBeST, using default parameters (55). Since TreeBeST requires a species tree to guide gene  
187 tree inference and perform reconciliation, we used the previously reported consensus molecular  
188 phylogeny (i.e., Osteoglossocephala scenario, Figure 2B), in an effort to not bias the inferences  
189 towards the Elopsteoglossocephala scenario. We however note that while the chosen species  
190 phylogeny impacts TreeBeST gene tree topologies, it does not alter the orthology inferences and  
191 orthologous gene sets that we leverage in all downstream analyses. Finally, since whole genome  
192 duplications (WGD) are known as a prominent source of errors in gene trees, we ran SCORPiOs  
193 (version 2.0.0) to account for the teleost WGD and correct gene trees accordingly (58). We ran  
194 SCORPiOs for five rounds of iterative gene tree correction, using the bowfin and spotted gar genomes  
195 as outgroups to the WGD and the same species phylogeny as for the TreeBeST gene tree inferences.  
196 Similarly, SCORPiOs only uses the species phylogeny to guide gene tree topologies, thus it does not  
197 impact the definition of orthologous genes sets.

198

### 199 **Selection of orthologous marker genes**

200

201 We exploit the high-confidence orthology relationships inferred in the SCORPiOs gene trees to derive  
202 sets of orthologous marker genes. For molecular phylogenies reconstruction, we extracted the set of  
203 all 955 strictly one-to-one orthologous gene families. The average size of aligned sequences for these  
204 955 families is of 2,438 nucleotides, with the smallest alignment comprising 321 nucleotides and a  
205 total combined alignment size of 2,328,657 nucleotides, which is significantly more than all previous  
206 studies (Fig. S1). For the microsynteny-based phylogeny, we completed the set of 955 high-  
207 confidence one-to-one markers with 2,086 additional genes, thus obtaining a total of 3,041 markers.

208 The additional 2,086 markers comprise genes that exist in exactly one copy in non-duplicated  
209 outgroup genomes (chicken, western clawed frog, spotted gar and bowfin) and in either one or two  
210 copies in teleosts as a result of the teleost WGD. These additional markers were included in order to  
211 cover a larger proportion of the genomes and leverage the post-WGD rediploidisation history (shared  
212 gene copy losses) for phylogeny reconstruction (see Microsynteny phylogeny below).

213

### 214 **Molecular phylogeny from gene tree collections**

215

216 To reconstruct molecular phylogenies for teleost genomes, we took advantage of ASTRAL-III (23),  
217 a summary method to infer species trees from collections of gene trees. ASTRAL accounts for  
218 discordance among gene trees and species trees by explicitly modeling incomplete lineage sorting  
219 under the multi-species coalescent model. Here, we first built individual gene trees for each of the  
220 955 gene families using RAxML 8.2.12 (59), under the GTRGAMMA model of sequence evolution  
221 (codon alignments) or PROTGAMMAJTT (protein alignments). The Maximum Likelihood (ML)  
222 searches were conducted from 10 starting trees (-N 10). Codon alignments were analyzed as two  
223 partitions: one partition for first and second codon positions and one partition for the third codon  
224 position. Species phylogenies were then computed from the set of 955 estimated ML trees using  
225 ASTRAL-III version 5.7.3 (23), with default parameters.

226

### 227 **Molecular phylogeny from concatenated sequences**

228

229 We used RAxML 8.2.12 (59) to infer phylogenies from the nucleic and protein concatenated  
230 sequences of the 955 orthologous marker genes. We conducted Maximum Likelihood searches from  
231 10 starting trees and generated 100 bootstrap replicates. Phylogenies were inferred under the  
232 GTRGAMMA model of sequence evolution for codon alignments, partitioned by each codon position  
233 and the PROTGAMMAJTT model for protein alignments.

234

### 235 **Gene genealogy interrogation**

236

237 We conducted a gene genealogy interrogation analysis (60) to evaluate the support given by each of  
238 the 955 gene alignments to the three phylogenetic hypotheses (Fig. 3B). We first performed three



239 additional ML tree reconstructions for each of the 955 alignments, where we constrained the tree  
240 topologies to follow each of the three branching hypotheses presented in Fig. 1. To do so, we used  
241 constrained RAxML searches with the same models and parameters as detailed previously (see  
242 Molecular phylogeny from gene tree collections). We next used CONSEL (61) to rank gene trees  
243 according to their likelihood and perform likelihood AU-tests (62). Note that we included the  
244 unconstrained ML tree in the set of trees considered by the AU-tests, as it mitigates cases where none  
245 of the 3 hypotheses are supported by the data (due to undue paralogs inclusion, strong incomplete  
246 lineage sorting, introgression or other evolutionary events). One gene tree was considered  
247 significantly better than the others when both alternative topologies were rejected by AU-tests at  
248  $\alpha=0.05$ .

249

### 250 **Microsynteny phylogeny**

251

252 We built a microsynteny-based phylogeny using an approach previously successful in resolving the  
253 bowfin position in the fish tree of life (21). Here, we reduced the 25 studied genomes to the set of  
254 3,041 ordered marker genes (see Selection of orthologous marker genes). The average genomic  
255 distance between these markers is 91 kb, with an end-to-end coverage encompassing 86% of selected  
256 genomes (Fig. S5). We leveraged adjacency conservation between these markers to reconstruct the  
257 teleost phylogeny. In this setting, gene adjacencies are broken along teleosts evolution either by  
258 small-scale rearrangements or loss of duplicated gene copies. We first estimated pairwise  
259 evolutionary distances between genomes using a normalized breakpoint distance, simply computed  
260 as:  $(1 - \text{SHARED\_ADJ}) / \min(\text{ADJ1}, \text{ADJ2})$ , where SHARED\_ADJ is the number of shared gene  
261 adjacencies, and ADJ1 and ADJ2 the total number of adjacencies in genome 1 and genome 2,  
262 respectively. Based on these computed distances, we constructed a rearrangement-based neighbor-  
263 joining (NJ) tree. Bootstrap supports were obtained from 100 random re-sampling of the columns of  
264 the complete adjacency absence/presence matrix, with replacement.

265

### 266 **Macrosynteny phylogeny**

267

268 We used PhyChro (22) to reconstruct the teleost phylogeny from the evolutionary signal contained in  
269 synteny block breakpoints. We first computed all pairwise synteny block breakpoints for the 25

270 studied genomes using SynChro (22), with the parameter --delta 3. Across comparisons, we recovered  
271 an average of 1,642 synteny blocks, an average block size of 191 kb and an average genomic coverage  
272 of 63% (Fig. S5). As such, the macrosyntenic approach employed here indeed considers larger  
273 genomic scale rearrangement events than the gene adjacency approach (Fig. S5). We then directly  
274 invoked PhyChro on the set of computed synteny comparisons, with default parameters and --delta  
275 3, to reconstruct the teleost phylogeny. Note that synteny blocks inferred by SynChro do not make  
276 use of our pre-defined orthologous marker genes, but infers orthologous genes for each pairwise  
277 comparison, using both sequence-based and synteny-based orthology criteria. From the complete set  
278 of synteny breakpoints revealed by SynChro, PhyChro assembles a collection of phylogenetically  
279 informative breakpoints, i.e., breakpoints that allow grouping genomes into two disjoint sets.  
280 PhyChro then computes a distance between all genome pairs, based on the number of times the two  
281 genomes are found into different groupings of such sets. Finally, PhyChro reconstructs the phylogeny  
282 with the fewest breakpoint inconsistencies, by iteratively grouping genomes with the smallest  
283 distance. Confidence scores range between 0 and 1 and correspond to the proportion of informative  
284 breakpoints supporting that node, reflecting the phylogenetic signal supporting internal nodes. The  
285 PhyChro strategy has been shown to accurately reconstruct branches even with a very low  
286 phylogenetic signal, such as the position of the fast-evolving Rodentia clade (PhyChro confidence  
287 score = 0.03) (22).

288

### 289 **Fusions of ancestral chromosomes in modern teleost karyotypes**

290

291 We identified pre-duplication ancestral chromosomes based on a previous reconstruction of the  
292 ancestral teleost karyotype (63). We next applied an approach similar to (64) to identify ‘a’ and ‘b’  
293 ancestrally-duplicated chromosome copies across teleost genomes. Here, we leveraged paralogy and  
294 orthology relationships contained in the full set of SCORPiOs phylogenetic gene trees (see “Genome-  
295 wide phylogenetic gene trees”). Using the goldeye genome as a reference, we use (i) paralogous genes  
296 to identify ‘a’ and ‘b’ chromosome copies within the goldeye genome and (ii) orthologous genes to  
297 propagate these ‘a’ and ‘b’ annotations across species. We note that while for some genes, errors  
298 might remain in the orthology assignments, these errors are unlikely to affect whole chromosomes.  
299 Indeed, gene orthologies are inferred from independent gene trees. Finally, we used RIdeogram (65)  
300 to plot ancestral chromosomes on modern teleost karyotypes. We used plotting parameters aimed at

301 reducing the noise induced by small-scale rearrangements and fragmented genome assemblies. We  
302 show only chromosome/scaffolds with over 50 genes and at least 5% of genes assigned to ancestral  
303 chromosomes under study (1a, 1b, 2a, 2b). Similarly, an ancestral chromosome color is painted on a  
304 modern chromosome/scaffold if it contains at least 5% of these ancestral chromosome genes. The  
305 two fusion events that we present (Fig. 4, Fig. S6) are the only chromosome-scale shared  
306 rearrangement events with one fusion only shared in Elopomorpha and Osteoglossomorpha, and the  
307 second only amongst Clupeocephala.

308

### 309 **Data and scripts availability**

310

311 All input data (sets of orthologous marker genes, CDS codons alignments, gene coordinates files) and  
312 the generated reconstructed species phylogenies have been deposited in Zenodo (doi:  
313 10.5281/zenodo.6414307), along with all scripts and environments to reproduce the analyses. In  
314 particular, the ASTRAL-III and gene genealogy interrogation analyses can be reproduced in a single  
315 command from the deposited snakemake pipeline. The microsynteny phylogeny can be reproduced  
316 by running the provided Jupyter Notebook. Finally, we provide instructions and commands to run  
317 PhyChro and reproduce the macrosynteny phylogeny.

318

319

320 **Supplementary Text**

321

322 **Section 1: Rationale behind the naming of the Elopsteoglossocephala clade**

323 Elopsteoglossocephala, the name given to the clade containing the Elopomorpha and the  
324 Osteoglossomorpha, has been made from the fusion of the prefix *elopo-* referring to the Elopomorpha  
325 and the prefix *osteoglosso-* referring to the Osteoglossomorpha. The suffix *-cephala* is proposed to  
326 rank the clade as a supercohort, as close as possible to the ranking proposed by Betancur et al. (2017)  
327 (12). As the tree gains an element of symmetry, a rank disappears and the "*-cephalai*" megacohort  
328 rank of Betancur et al. (2017) (12) is no longer necessary as in the new topology the two sister groups  
329 have the same rank:

330 **Infraclass:** Teleostei (as in (12))

331 **Supercohort:** Elopsteoglossocephala (this study)

332 **Cohort:** Elopomorpha (as in (12))

333 **Cohort:** Osteoglossomorpha (proposed as a cohort in this study)

334 **Supercohort:** Clupeocephala (supercohort as in (12))

335 **Cohort:** Otomorpha (cohort, as in (12))

336 **Cohort:** Euteleosteomorpha (as in (12): the rest of teleosts, i.e., Euteleostei).

337

338

339 **Section 2: Review of the anatomical literature and search for potential Elopsteoglossocephala**  
340 **synapomorphies.**

341 From anatomical and morphological characters of fossil and extant ray-finned fish taxa, Patterson  
342 and Rosen (6) found a sister group relationship between Osteoglossomorpha and the rest of  
343 teleosteans, calling this new group Elopcephala. Elopcephalan synapomorphies were (a) only two  
344 uroneurals extending beyond the second ural centrum and (b) intermuscular epipleural bones present

345 in the caudal region. Arratia (7), however, found these characters as homoplastic when adding new  
346 fossils to an anatomical matrix of fossil and extant taxa, and concluded on a sister-group relationship  
347 between Elopomorpha and the rest of teleosteans, calling this new group Osteoglossocephala.  
348 Osteoglossocephalan synapomorphies were (a) the antorbital branch of the infraorbital sensory canal  
349 not enclosed by the antorbital bone, (b) the posterior opening of the mandibular sensory canal laterally  
350 placed on the angular portion of the lower jaw, (c) seven or fewer hypurals, (d) absence of urodermal  
351 (at least primitively), (e) long dorsal segmented procurrent rays in the caudal fin, (f) no dorsal  
352 processes in the innermost principal caudal rays of the upper lobe of the caudal fin, (g) principal  
353 caudal rays with straight segmentation. However, figure 106 in (7) shows that all these characters are  
354 homoplastic, and the Osteoglossocephala group does not seem to be better supported than Patterson  
355 and Rosen's Elopocephala group. A close examination of the matrix in (7) shows that there are no  
356 character states exclusively shared by *Elops*, †*Anaethalion*, i.e., the two sampled Elopomorpha, and  
357 *Hiodon* and †*Lycoptera*, i.e., the two Osteoglossomorpha sampled. Actually, none of the anatomical  
358 studies having sampled both Elopomorpha and Osteoglossomorpha for a cladistic analysis concluded  
359 in favor of a sister-group relationship of the two groups. Unfortunately, these studies did not exhibit  
360 their homoplastic characters onto their trees (excepted (7)), a practice that would allow to identify a  
361 possible weak anatomical signal, i.e., characters shared by Osteoglossomorpha and Elopomorpha but  
362 appearing twice in a tree where other -more consistent- characters separate the two groups. The  
363 careful examination of the character matrices published to date did not allow the detection of  
364 characters exclusively shared by the two groups.

365 One character though, Char. 247 of Diogo et al. (2008) (26) is shared by Elopomorpha and the  
366 osteoglossomorphans *Mormyrus*. The shared derived state of this character is the "absence of a  
367 retroarticular as an independent ossification". Fusion of the retroarticular with the angular (6, 66)  
368 and/or the articular (26) has been previously considered a synapomorphy of the Elopomorpha (Arratia  
369 coded this derived character as fused angular and retroarticular, with the articular bone partially fusing  
370 with the retroarticular late in ontogeny for *Elops* and †*Anaethalion* (7)). According to Diogo et al.  
371 (2008) (26) this character is ambiguous in *Hiodon* because some authors have not observed  
372 independent retroarticulars, which were instead fused with the angulars (27, 66), while other authors  
373 have observed retroarticulars independent from the angulars (7, 67). This derived character is absent  
374 in the two other Osteoglossomorpha of Diogo et al.'s sample, *Xenomystus* and *Pantodon*. This derived  
375 character is, however, also present in siluriformes. Thus, this derived state could represent a

376 synapomorphy of the clade uniting Elopomorpha and Osteoglossomorpha, that would have been  
377 secondarily lost in *Xenomystus* and *Pantodon*, or alternatively could represent a homoplastic character  
378 independently acquired in Elopomorpha and *Mormyrus*. The former hypothesis may be favored  
379 because, following Nelson (1973) (66), Hilton (2003) (27) considered that several patterns of bone  
380 fusion observed in Elopomorpha are also found in Osteoglossomorpha.

381 The fusion of retroarticular and angular was shown to occur during ontogeny in *Hiodon* (68). Among  
382 other osteoglossomorpha, the angulars are fused with the articulars in some osteoglossids (*Pantodon*,  
383 *Scleropages*, *Osteoglossum*), and notopterids (*Chitala*, *Xenomystus*, *Papyrocranus*) (27).  
384 Retroarticulars, articulars, and angulars are not fused in the osteoglossids *Arapaima* and *Heterotis*,  
385 while fused in mormyrids (*Petrocephalus*, *Gnathonemus*, *Campylomormyrus*) (27). The basal fossils  
386 Osteoglossomorpha †*Lycoptera* and †*Ostariostoma* have unclear conditions. Because *Hiodon*, which  
387 is the most early diverging Osteoglossomorpha, its fossil sister group †*Eohiodon* (27), and mormyrids  
388 exhibit an angular-retroarticular fusion, we provisionally consider that the tendency of such fusion  
389 could be the primitive condition in Osteoglossomorpha, thus a possible synapomorphy of the  
390 Eloposteoglossocephala group uniting Elopomorpha and Osteoglossomorpha, even though with some  
391 homoplastic changes (i.e., reversal to ancestral unfused character state) within Osteoglossomorpha.  
392 Further studies are necessary to better grasp the extent of angular-retroarticular bone fusion across  
393 the early diverging (i.e., non acanthomorph) teleostean diversity.

394

## 395 **References**

- 396 28. Q. Pan, R. Feron, A. Yano, R. Guyomard, E. Jouanno, E. Vigouroux, M. Wen, J.-M. Busnel,  
397 J. Bobe, J.-P. Concordet, H. Parrinello, L. Journot, C. Klopp, J. Lluch, C. Roques, J. Postlethwait, M.  
398 Scharl, A. Herpin, Y. Guiguen, Identification of the master sex determining gene in Northern pike  
399 (*Esox lucius*) reveals restricted sex chromosome differentiation. *PLOS Genetics*. **15**, e1008013  
400 (2019).
- 401 29. J. Pasquier, C. Cabau, T. Nguyen, E. Jouanno, D. Severac, I. Braasch, L. Journot, P. Pontarotti,  
402 C. Klopp, J. H. Postlethwait, Y. Guiguen, J. Bobe, Gene evolution and gene expression after whole  
403 genome duplication in fish: the PhyloFish database. *BMC Genomics*. **17**, 368 (2016).
- 404 30. S. Foissac, S. Djebali, K. Munyard, N. Vialaneix, A. Rau, K. Muret, D. Esquerré, M. Zytnicki,  
405 T. Derrien, P. Bardou, F. Blanc, C. Cabau, E. Crisci, S. Dhorne-Pollet, F. Drouet, T. Faraut, I.  
406 Gonzalez, A. Goubil, S. Lacroix-Lamandé, F. Laurent, S. Marthey, M. Marti-Marimon, R. Momal-  
407 Leisenring, F. Mompert, P. Quéré, D. Robelin, M. S. Cristobal, G. Tosser-Klopp, S. Vincent-  
408 Naulleau, S. Fabre, M.-H. Pinard-Van der Laan, C. Klopp, M. Tixier-Boichard, H. Acloque, S.  
409 Lagarrigue, E. Giuffra, Multi-species annotation of transcriptome and chromatin structure in

410 domesticated animals. *BMC Biology*. **17**, 108 (2019).

411 31. J. Ruan, H. Li, Fast and accurate long-read assembly with wtdbg2. *Nat Methods*. **17**, 155–158  
412 (2020).

413 32. R. Vaser, I. Sović, N. Nagarajan, M. Šikić, Fast and accurate de novo genome assembly from  
414 long uncorrected reads. *Genome Res*. **27**, 737–746 (2017).

415 33. H. Li, Minimap2: pairwise alignment for nucleotide sequences. *Bioinformatics*. **34**, 3094–  
416 3100 (2018).

417 34. B. J. Walker, T. Abeel, T. Shea, M. Priest, A. Abouelliel, S. Sakthikumar, C. A. Cuomo, Q.  
418 Zeng, J. Wortman, S. K. Young, A. M. Earl, Pilon: an integrated tool for comprehensive microbial  
419 variant detection and genome assembly improvement. *PLoS ONE*. **9**, e112963 (2014).

420 35. H. Li, R. Durbin, Fast and accurate short read alignment with Burrows-Wheeler transform.  
421 *Bioinformatics*. **25**, 1754–1760 (2009).

422 36. H. Li, B. Handsaker, A. Wysoker, T. Fennell, J. Ruan, N. Homer, G. Marth, G. Abecasis, R.  
423 Durbin, 1000 Genome Project Data Processing Subgroup, The Sequence Alignment/Map format and  
424 SAMtools. *Bioinformatics*. **25**, 2078–2079 (2009).

425 37. P. Marks, S. Garcia, A. M. Barrio, K. Belhocine, J. Bernate, R. Bharadwaj, K. Bjornson, C.  
426 Catalanotti, J. Delaney, A. Fehr, I. T. Fiddes, B. Galvin, H. Heaton, J. Herschleb, C. Hindson, E. Holt,  
427 C. B. Jabara, S. Jett, N. Keivanfar, S. Kyriazopoulou-Panagiotopoulou, M. Lek, B. Lin, A. Lowe, S.  
428 Mahamdallie, S. Maheshwari, T. Makarewicz, J. Marshall, F. Meschi, C. J. O’Keefe, H. Ordonez, P.  
429 Patel, A. Price, A. Royall, E. Ruark, S. Seal, M. Schnall-Levin, P. Shah, D. Stafford, S. Williams, I.  
430 Wu, A. W. Xu, N. Rahman, D. MacArthur, D. M. Church, Resolving the full spectrum of human  
431 genome variation using Linked-Reads. *Genome Res*. (2019), doi:10.1101/gr.234443.118.

432 38. N. C. Durand, M. S. Shamim, I. Machol, S. S. P. Rao, M. H. Huntley, E. S. Lander, E. L.  
433 Aiden, Juicer Provides a One-Click System for Analyzing Loop-Resolution Hi-C Experiments. *Cell*  
434 *Syst*. **3**, 95–98 (2016).

435 39. O. Dudchenko, S. S. Batra, A. D. Omer, S. K. Nyquist, M. Hoeger, N. C. Durand, M. S.  
436 Shamim, I. Machol, E. S. Lander, A. P. Aiden, E. L. Aiden, De novo assembly of the *Aedes aegypti*  
437 genome using Hi-C yields chromosome-length scaffolds. *Science*. **356**, 92–95 (2017).

438 40. N. C. Durand, J. T. Robinson, M. S. Shamim, I. Machol, J. P. Mesirov, E. S. Lander, E. L.  
439 Aiden, Juicebox Provides a Visualization System for Hi-C Contact Maps with Unlimited Zoom. *cells*.  
440 **3**, 99–101 (2016).

441 41. S. Yeo, L. Coombe, R. L. Warren, J. Chu, I. Birol, ARCS: scaffolding genome drafts with  
442 linked reads. *Bioinformatics*. **34**, 725–731 (2018).

443 42. H. Cheng, G. T. Concepcion, X. Feng, H. Zhang, H. Li, Haplotype-resolved de novo assembly  
444 using phased assembly graphs with hifiasm. *Nat Methods*. **18**, 170–175 (2021).

445 43. M. Tarailo-Graovac, N. Chen, *Current Protocols in Bioinformatics*, in press,  
446 doi:10.1002/0471250953.bi0410s25.

447 44. A. Morgulis, E. M. Gertz, A. A. Schäffer, R. Agarwala, A fast and symmetric DUST  
448 implementation to mask low-complexity DNA sequences. *J. Comput. Biol*. **13**, 1028–1040 (2006).

449 45. G. Benson, Tandem repeats finder: a program to analyze DNA sequences. *Nucleic Acids Res*.  
450 **27**, 573–580 (1999).

451 46. A. R. Quinlan, I. M. Hall, BEDTools: a flexible suite of utilities for comparing genomic  
452 features. *Bioinformatics*. **26**, 841–842 (2010).

453 47. C. Holt, M. Yandell, MAKER2: an annotation pipeline and genome-database management  
454 tool for second-generation genome projects. *BMC Bioinformatics*. **12**, 491 (2011).

455 48. G. S. C. Slater, E. Birney, Automated generation of heuristics for biological sequence

456 comparison. *BMC Bioinformatics*. **6**, 31 (2005).

457 49. A. Dobin, C. A. Davis, F. Schlesinger, J. Drenkow, C. Zaleski, S. Jha, P. Batut, M. Chaisson,  
458 T. R. Gingeras, STAR: ultrafast universal RNA-seq aligner. *Bioinformatics*. **29**, 15–21 (2013).

459 50. C. Trapnell, B. A. Williams, G. Pertea, A. Mortazavi, G. Kwan, M. J. van Baren, S. L.  
460 Salzberg, B. J. Wold, L. Pachter, Transcript assembly and quantification by RNA-Seq reveals  
461 unannotated transcripts and isoform switching during cell differentiation. *Nat. Biotechnol.* **28**, 511–  
462 515 (2010).

463 51. K. J. Hoff, S. Lange, A. Lomsadze, M. Borodovsky, M. Stanke, BRAKER1: Unsupervised  
464 RNA-Seq-Based Genome Annotation with GeneMark-ET and AUGUSTUS. *Bioinformatics*. **32**,  
465 767–769 (2016).

466 52. M. Stanke, O. Keller, I. Gunduz, A. Hayes, S. Waack, B. Morgenstern, AUGUSTUS: ab initio  
467 prediction of alternative transcripts. *Nucleic Acids Res.* **34**, W435–439 (2006).

468 53. K. Eilbeck, B. Moore, C. Holt, M. Yandell, Quantitative measures for the management and  
469 comparison of annotated genomes. *BMC Bioinformatics*. **10**, 67 (2009).

470 54. M. Manni, M. R. Berkeley, M. Seppey, F. A. Simão, E. M. Zdobnov, BUSCO Update: Novel  
471 and Streamlined Workflows along with Broader and Deeper Phylogenetic Coverage for Scoring of  
472 Eukaryotic, Prokaryotic, and Viral Genomes. *Molecular Biology and Evolution*. **38**, 4647–4654  
473 (2021).

474 55. A. J. Vilella, J. Severin, A. Ureta-Vidal, L. Heng, R. Durbin, E. Birney, EnsemblCompara  
475 GeneTrees: Complete, duplication-aware phylogenetic trees in vertebrates. *Genome Res.* **19**, 327–  
476 335 (2009).

477 56. S. F. Altschul, W. Gish, W. Miller, E. W. Myers, D. J. Lipman, Basic local alignment search  
478 tool. *J Mol Biol.* **215**, 403–410 (1990).

479 57. I. M. Wallace, O. O’Sullivan, D. G. Higgins, C. Notredame, M-Coffee: combining multiple  
480 sequence alignment methods with T-Coffee. *Nucleic Acids Res.* **34**, 1692–1699 (2006).

481 58. E. Parey, A. Louis, C. Cabau, Y. Guiguen, H. R. Crollius, C. Berthelot, Synteny-guided  
482 resolution of gene trees clarifies the functional impact of whole genome duplications. *Mol. Biol. Evol.*  
483 (2020), doi:10.1093/molbev/msaa149.

484 59. A. Stamatakis, RAxML version 8: a tool for phylogenetic analysis and post-analysis of large  
485 phylogenies. *Bioinformatics*. **30**, 1312–1313 (2014).

486 60. D. Arcila, G. Ortí, R. Vari, J. W. Armbruster, M. L. J. Stiassny, K. D. Ko, M. H. Sabaj, J.  
487 Lundberg, L. J. Revell, R. Betancur-R., Genome-wide interrogation advances resolution of  
488 recalcitrant groups in the tree of life. *Nat Ecol Evol.* **1**, 1–10 (2017).

489 61. H. Shimodaira, M. Hasegawa, CONSEL: for assessing the confidence of phylogenetic tree  
490 selection. *Bioinformatics*. **17**, 1246–1247 (2001).

491 62. H. Shimodaira, An approximately unbiased test of phylogenetic tree selection. *Syst Biol.* **51**,  
492 492–508 (2002).

493 63. Y. Nakatani, A. McLysaght, Genomes as documents of evolutionary history: a probabilistic  
494 macrosynteny model for the reconstruction of ancestral genomes. *Bioinformatics*. **33**, i369–i378  
495 (2017).

496 64. E. Parey, A. Louis, J. Monfort, Y. Guiguen, H. R. Crollius, C. Berthelot, A high-resolution  
497 comparative atlas across 74 fish genomes illuminates teleost evolution after whole-genome  
498 duplication (2022), p. 2022.01.13.476171, , doi:10.1101/2022.01.13.476171.

499 65. Z. Hao, D. Lv, Y. Ge, J. Shi, D. Weijers, G. Yu, J. Chen, RIdeogram: drawing SVG graphics  
500 to visualize and map genome-wide data on the ideograms. *PeerJ Comput Sci.* **6**, e251 (2020).

501 66. G. Nelson, Relationships of clupeomorphs, with remarks on the structure of the lower jaw in



502 fishes. *Interrelationships of fishes*, 333–349 (1973).  
503 67. L. Taverne, *Ostéologie, phylogénèse et systématique des Téléostéens fossiles et actuels du*  
504 *super-ordre des Ostéoglossomorphes: Ostéologie des genres Hiodon, Eohiodon, Lycoptera,*  
505 *Osteoglossum, Scleropages, Heterotis et Arapaima* (Palais des académies, 1977;  
506 <https://books.google.fr/books?id=AhwMAQAIAAJ>), vol. 42 of *Académie Royale de Belgique,*  
507 *Mémoires de la Classe des Sciences*.  
508 68. E. J. Hilton, *Osteology of the extant North American fishes of the genus Hiodon Lesueur, 1818*  
509 *(Teleostei: Osteoglossomorpha: Hiodontiformes)* (Field Museum of Natural History, 2002;  
510 <https://www.biodiversitylibrary.org/bibliography/2666>), *Fieldiana (Zoology) New Series*.  
511 69. B. C. Faircloth, L. Sorenson, F. Santini, M. E. Alfaro, A Phylogenomic Perspective on the  
512 Radiation of Ray-Finned Fishes Based upon Targeted Sequencing of Ultraconserved Elements  
513 (UCEs). *PLoS One*. **8**, e65923 (2013).  
514 70. C. M. Austin, M. H. Tan, L. J. Croft, M. P. Hammer, H. M. Gan, Whole Genome Sequencing  
515 of the Asian Arowana (*Scleropages formosus*) Provides Insights into the Evolution of Ray-Finned  
516 Fishes. *Genome Biol Evol.* **7**, 2885–2895 (2015).  
517  
518

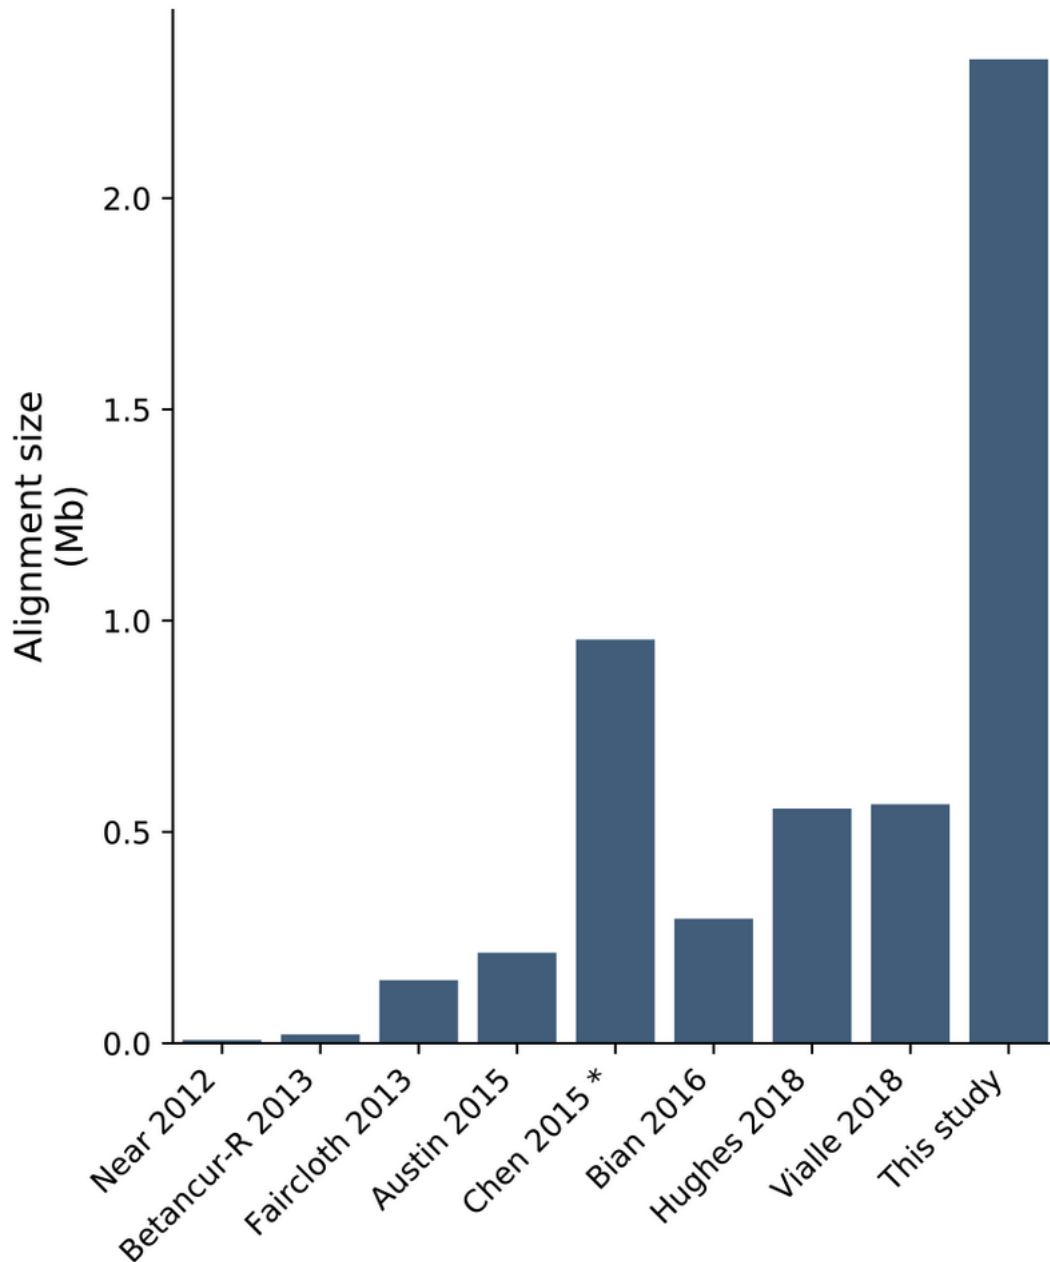

519

520 **Fig. S1. Alignments used in previous teleost molecular phylogenies.** Total size of nucleotide  
 521 alignments leveraged for previous phylogeny inference in teleosts (10–12, 16–18, 69, 70), compared  
 522 with our dataset. Alignment sizes are provided as reported by the authors of the respective studies,  
 523 with the exception of Chen et al 2015 (16), as the authors did not only focus on teleost fishes but  
 524 inferred a complete vertebrate phylogeny. We thus report here the subset of the alignment that is  
 525 informative for teleost fishes (i.e., with a low proportion of gaps and missing data in teleosts), as  
 526 identified by Takezaki 2021 (9).

527

528

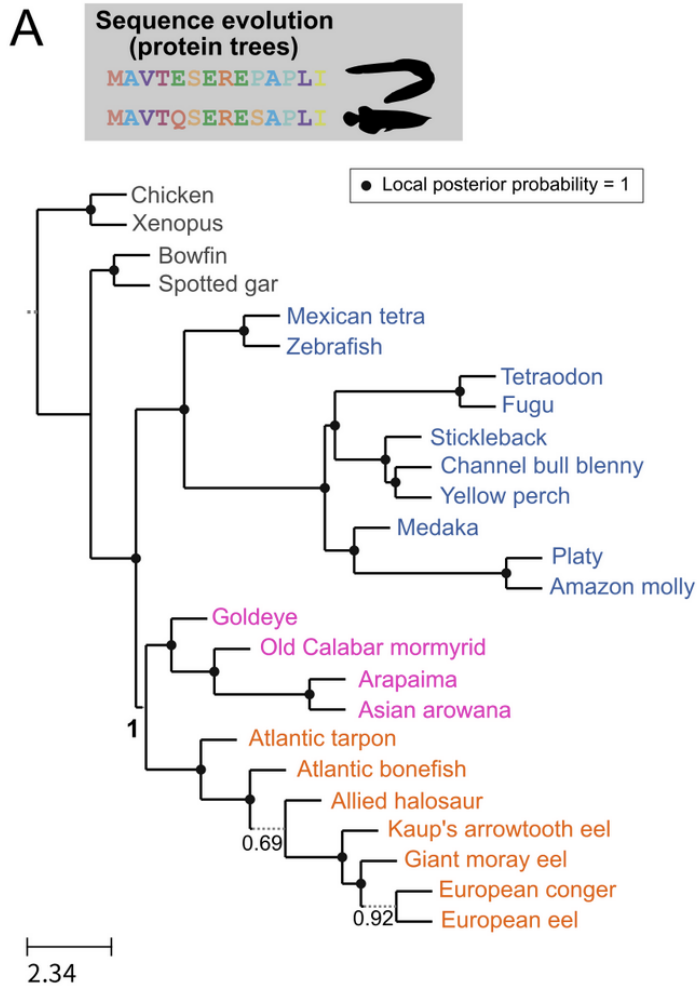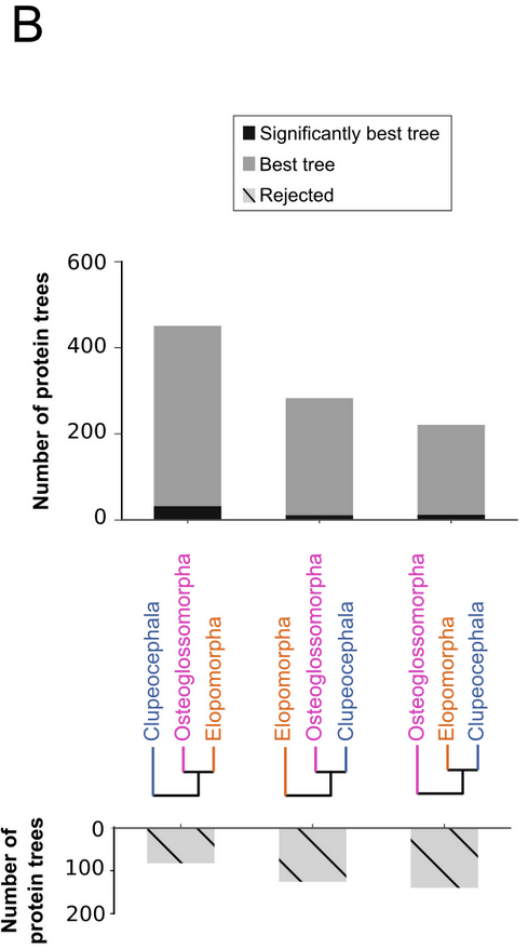

529

530 **Fig. S2. Molecular phylogeny inferred from protein trees.** A. Species tree inferred with ASTRAL-  
 531 III from 955 single-copy protein trees. B. Gene genealogy interrogation: number of protein trees  
 532 supporting each hypothesis (top, gray bars), significantly supporting each hypothesis (top, black  
 533 bars), and number of significantly rejected gene trees (bottom, dashed bar).

534

535

536

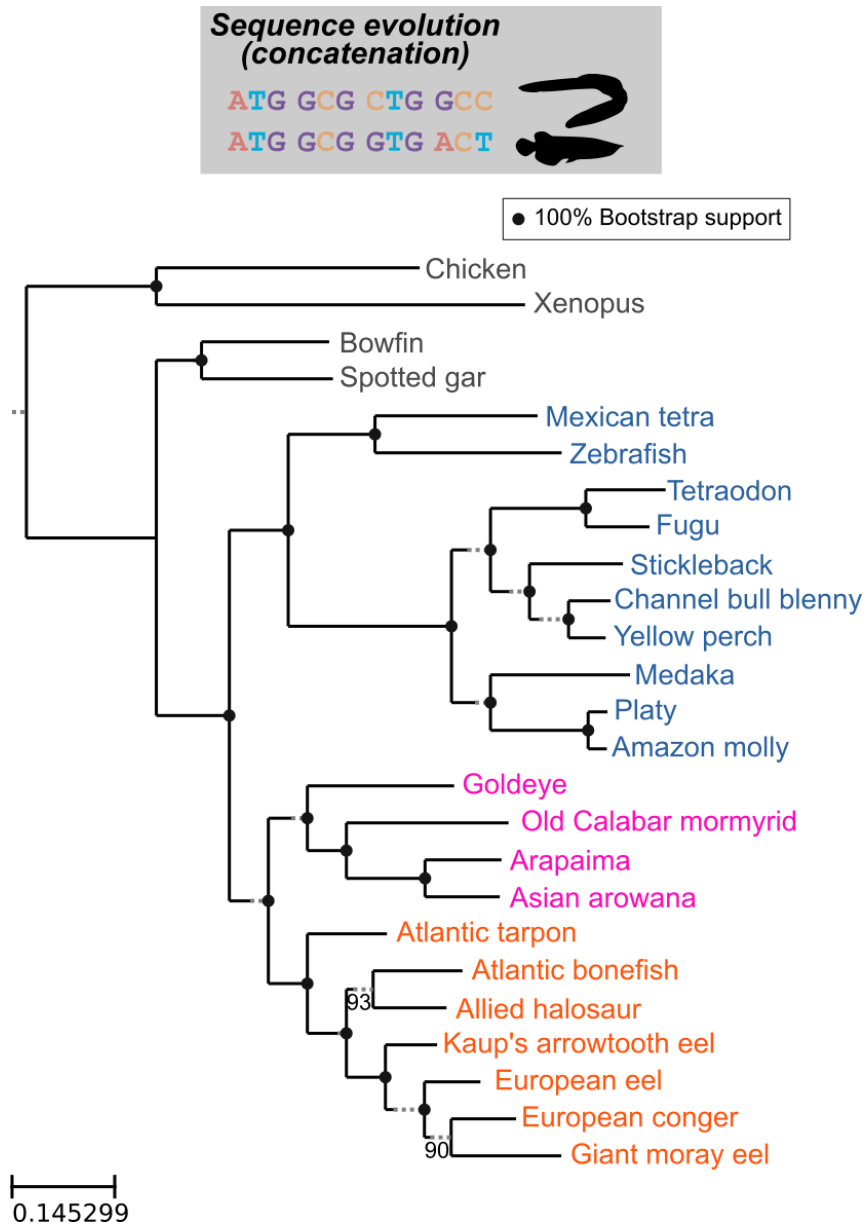

537

538 **Fig. S3. Molecular phylogeny inferred from the concatenation of nucleotide coding sequences.**

539 RAxML tree inferred from the concatenation of the 955 nucleotide coding sequences.

540

541

542

**Sequence evolution  
(concatenation)**

MAVTESEREPAPLI

MAVTQSERESAPLI



● 100% Bootstrap support

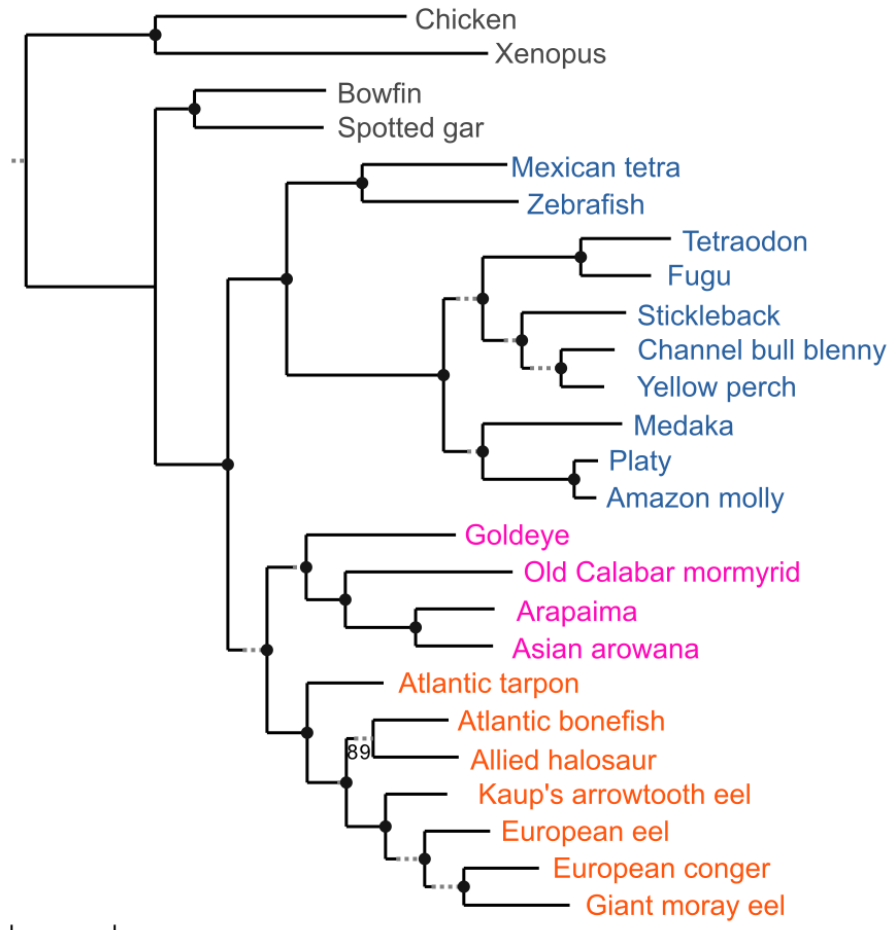

0.149984

543

544

545 **Fig. S4. Molecular phylogeny inferred from the concatenation of protein sequences.** RAxML  
 546 tree inferred from the concatenation of the 955 protein sequences.

547

548

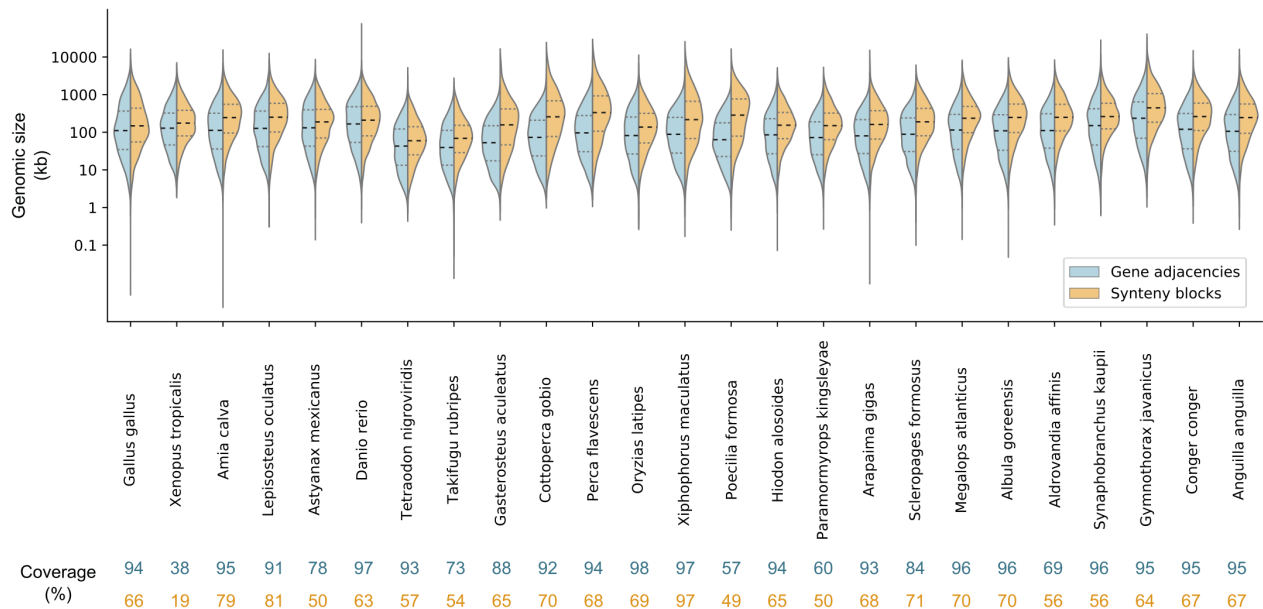

**Fig. S5. Genomic size of the gene adjacencies and synteny blocks leveraged for phylogeny inference.** For each genome, we show the distribution of distances between adjacent marker genes (microsynteny analysis) and the sizes of synteny blocks (macrosynteny analysis). We performed a total of 24 pairwise synteny inferences for each genome, but selected here the comparison with the most representative mean, for visualization purposes. Genomic coverage is indicated below the plot: end-to-end genomic coverage of adjacent marker genes (shown in blue, first line) and total coverage of synteny blocks (shown in orange, second line).

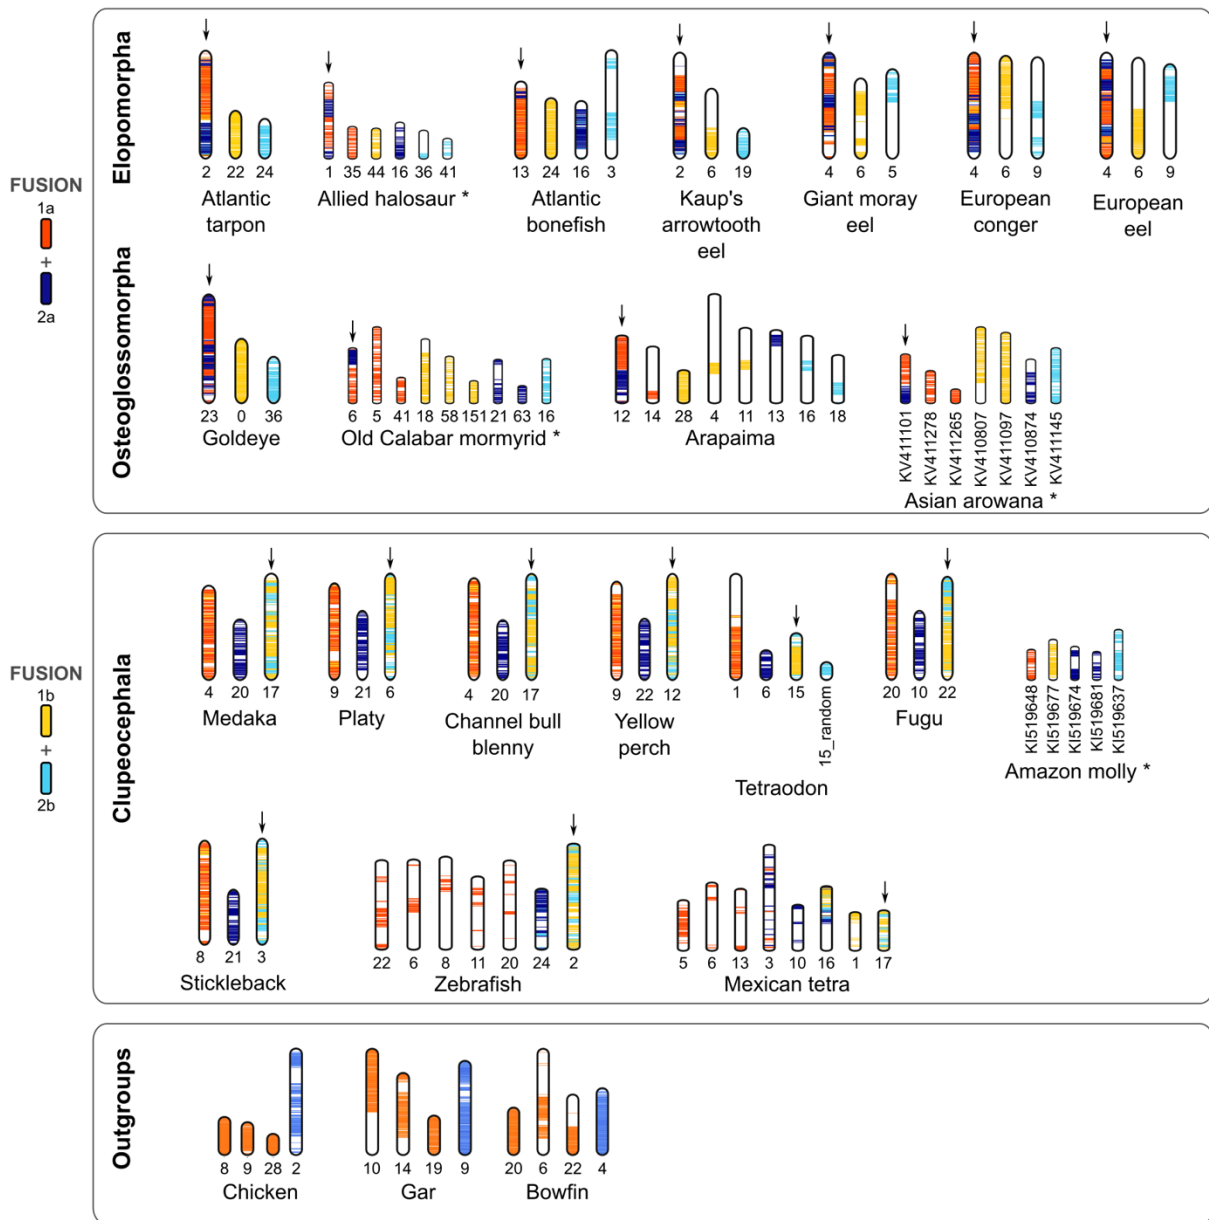

**Fig. S6. Fusions of ancestral chromosomes across all teleosts and outgroup genomes considered in this study.** Chromosomes are colored as in Figure 4, modern chromosomes descending from the fusion of ancestral chromosomes are indicated by an arrow. Stars at the end of species names indicate genomes with a scaffold-level assembly. The fusion of ancestral chromosomes 1a and 1b is identifiable in all Osteoglossomorpha and Elopomorpha genomes. Note that a subsequent fission seems to have occurred in the allied halosaur. The fusion of ancestral chromosomes 2a and 2b is identifiable in all Clupeocephala genomes with the exception of the Amazon molly, which has a highly fragmented assembly.

**Table S1. Elopomorpha genome assembly metrics**

| Scientific name               | Genome size | Contig N | Contig N50 | Contig L50 | Chr N | % Chr | Scaffold N50 | Scaffold L50 | Buscos scores (C ; S ; D ; F ; M) |
|-------------------------------|-------------|----------|------------|------------|-------|-------|--------------|--------------|-----------------------------------|
| <i>Megalops atlanticus</i>    | 0.99        | 920      | 17.7       | 71         | 25    | 98.2  | 39.4         | 10           | 96.3 ; 86.2 ; 10.1 ; 0.6 ; 3.1    |
| <i>Albula goreensis</i>       | 0.93        | 993      | 17.5       | 90         | 25    | 99.3  | 39.1         | 11           | 95.4 ; 87.9 ; 7.5 ; 0.4 ; 4.2     |
| <i>Aldrovandia affinis</i>    | 1.23        | 3957     | 2          | 169        | NA    | NA    | 3.8          | 88           | 89.2 ; 82.4 ; 6.8 ; 2.8 ; 8.0     |
| <i>Synaphobranchus kaupii</i> | 1.5         | 5597     | 0.5        | 3068       | 24    | 97.9  | 76.8         | 7            | 91.0 ; 84.1 ; 6.9 ; 2.2 ; 6.8     |
| <i>Gymnothorax javanicus</i>  | 2.1         | 2280     | 8.5        | 59         | 20    | 98.9  | 133.6        | 7            | 92.8 ; 88.3 ; 4.5 ; 1.5 ; 5.7     |
| <i>Anguilla anguilla</i>      | 1           | 2729     | 4.3        | 49         | 19    | 97.7  | 55.5         | 8            | 93.5 ; 86.6 ; 6.9 ; 1.8 ; 4.      |
| <i>Conger conger</i>          | 1           | 3867     | 1.4        | 194        | 19    | 96.8  | 55.2         | 8            | 91.4 ; 85.9 ; 5.5 ; 1.4 ; 7.2     |

Genome assembly size (Gb), Contig N = number of contigs, Contig or Scaffold N50 (Mb), Chr N = number of chromosomes, % Chr = percentage of the assembly anchored in chromosomes, Buscos (V4, in genome mode with actinopterygii lineage) scores in percentage (C = Complete, S = Single copy, D = Duplicated, F = Fragmented, M = Missing). N.A = Not Applicable as the *Aldrovandia affinis* genome assembly was not anchored on chromosomes.



**Table S2. Information on the Elopomorpha specimens collected for genome sequencing**

| Species name                  | Sequencing             | Specimen origin                                                    | Sample collectors                                             | Sampling date      | Sex     | Developmental stage |
|-------------------------------|------------------------|--------------------------------------------------------------------|---------------------------------------------------------------|--------------------|---------|---------------------|
| <i>Megalops atlanticus</i>    | ONT, 10X, RNA-Seq      | Aquarium trade, Nigeria coast according to provider                | Yann Guiguen, Julien Bobe, Ming Wen INRAE LPGP, France        | March 15, 2019     | unknown | Juvenile            |
| <i>Albula goreensis</i>       | ONT, 10X, HIC, RNA-Seq | Florida sea                                                        | Sahar Mejri, Aaron J. Adams Florida University, USA           | July 30, 2019      | unknown | adult               |
| <i>Aldrovandia affinis</i>    | ONT, 10X, RNA-Seq      | New Caledonia sea (at a depth around 1080 m)                       | Wei-Jen Chen National Taiwan University, Taiwan               | September 29, 2019 | female  | adult               |
| <i>Synaphobranchus kaupii</i> | ONT, 10X, RNA-Seq      | Taiwan sea (station: CP4170, 22°17.466N 119°59.652 E, depth 967 m) | Wei-Jen Chen, Janette Chen National Taiwan University, Taiwan | November 01, 2017  | unknown | adult               |
|                               | HIC                    | Taiwan sea (CP4209; ~1000m, off Kaohsiung)                         | Wei-Jen Chen National Taiwan University, Taiwan               | November 03, 2019  | female  | adult               |
| <i>Gymnothorax javanicus</i>  | ONT, 10X, HIC, RNA-Seq | Taiwan sea                                                         | Wei-Jen Chen, Michelle Lin National Taiwan University.        | September 07, 2018 | unknown | adult               |
| <i>Anguilla anguilla</i>      | ONT, Illumina          | Netherlands, Lake Veere                                            | Future Genomics Technologies The Netherlands                  | 2014               | female  | adult               |
|                               | HIC                    | France, Grand-Lieu lake                                            | Yann Guiguen, Ming Wen INRAE LPGP, France                     | December 23, 2018  | unknown | adult               |
| <i>Conger conger</i>          | ONT, 10X, HIC, RNA-Seq | France, South Ouest coast near Lorient                             | Yoann Guilloux, Fabien Quendo, Ming Wen (INRAE LPGP) France   | July 23, 2019      | unknown | adult               |

**Table S3. Elopomopha long read sequencing.** NR = not recorded

| Species name                  | Shearing (Kb) | Optionnal Sizing | Loading | FlowCell                     | Output (Gb)     | Total output (Gb) |
|-------------------------------|---------------|------------------|---------|------------------------------|-----------------|-------------------|
| <i>Megalops atlanticus</i>    | 20            | no               | 25 fM   | MinION 48H                   | 7               | 50                |
|                               | 20            | no               | 20 fM   | PromethION 64H               | 43              |                   |
| <i>Albula goreensis</i>       | 20            | Circulomics XS   | 22 fM   | GridION 72H                  | 5               | 44                |
|                               | 20            | Circulomics XS   | 22 fM   | PromethION 72H               | 39              |                   |
| <i>Aldrovandia affinis</i>    | 20            | Circulomics XS   | 25 fM   | GridION 72H                  | 7               | 47                |
|                               | 20            | Circulomics XS   | 24 fM   | PromethION 72H               | 17              |                   |
|                               | 20            | Circulomics XS   | 25 fM   | PromethION 72H               | 23              |                   |
| <i>Synaphobranchus kaupii</i> | 20            | no               | 50 pM   | Sequel II HiFi SMRTcell 30 H | 12 (HiFi reads) | 20 (HiFi reads)   |
|                               | 20            | no               | 60 pM   | Sequel II HiFi SMRTcell 30 H | 8 (HiFi reads)  |                   |
| <i>Gymnothorax javanicus</i>  | 20            | no               | 30 fM   | GridION 48H                  | 15              | 105               |
|                               | 25            | no               | 30 fM   | PromethION 64H               | 35              |                   |
|                               | 25            | no               | 25 fM   | PromethION 64H               | 55              |                   |
| <i>Anguilla anguilla</i>      | NR            | no               | NR      | GridION 48H                  | 11              | 35                |
|                               | NR            | no               | NR      | PromethION 64H               | 24              |                   |
| <i>Conger conger</i>          | 35            | Circulomics XS   | 16 fM   | GridION 48H                  | 3               | 39                |
|                               | 30            | Circulomics XS   | 8 fM    | Flongle 24H                  | 0.09            |                   |
|                               | 35            | Circulomics XS   | 16 fM   | GridION 48H                  | 5               |                   |
|                               | 20            | Circulomics XS   | 24 fM   | PromethION 72H               | 31              |                   |

**Table S4. Information on the species and the genome assembly resources used in this study**

| Common name           | Scientific name                 | class (subclass)             | infraclass | Cohort                   | Order             | Family           | Genome assembly ID                 |
|-----------------------|---------------------------------|------------------------------|------------|--------------------------|-------------------|------------------|------------------------------------|
| Chicken (1)           | <i>Gallus gallus</i>            | Aves                         | NA         | NA                       | Galliformes       | Phasianidae      | GCA_000002315.5                    |
| Xenopus (2)           | <i>Xenopus tropicalis</i>       | Amphibia                     | NA         | NA                       | Anura             | Pipidae          | GCA_000004195.1                    |
| Bowfin                | <i>Amia calva</i>               | Actinopteri<br>(Neopterygii) | Holostei   | NA                       | Amiiformes        | Amiidae          | GCA_017591415.1                    |
| Spotted gar           | <i>Lepisosteus oculatus</i>     | Actinopteri<br>(Neopterygii) | Holostei   | NA                       | Lepisosteiformes  | lepisosteidae    | GCA_000242695.1                    |
| Atlantic tarpon       | <i>Megalops atlanticus</i>      | Actinopteri<br>(Neopterygii) | Teleostei  | Elopomorpha              | Elopiformes       | Megalopidae      | GCA_019176425.1                    |
| Atlantic bonefish     | <i>Albula goreensis</i>         | Actinopteri<br>(Neopterygii) | Teleostei  | Elopomorpha              | Albuliformes      | Albulidae        | Submitted &<br>Available Dataverse |
| Allied Halosaur       | <i>Aldrovandia affinis</i>      | Actinopteri<br>(Neopterygii) | Teleostei  | Elopomorpha              | Notacanthiformes  | Halosauridae     | Submitted &<br>Available Dataverse |
| Kaup's arrowtooth eel | <i>Synphobranchus kaupii</i>    | Actinopteri<br>(Neopterygii) | Teleostei  | Elopomorpha              | Anguilliformes    | Protanguilloidae | Submitted &<br>Available Dataverse |
| Moray eel             | <i>Gymnothorax javanicus</i>    | Actinopteri<br>(Neopterygii) | Teleostei  | Elopomorpha              | Anguilliformes    | Muraenidae       | Submitted &<br>Available Dataverse |
| European eel          | <i>Anguilla anguilla</i>        | Actinopteri<br>(Neopterygii) | Teleostei  | Elopomorpha              | Anguilliformes    | Anguillidae      | GCA_018320845.1                    |
| European conger       | <i>Conger conger</i>            | Actinopteri<br>(Neopterygii) | Teleostei  | Elopomorpha              | Anguilliformes    | Congridae        | Submitted &<br>Available Dataverse |
| Goldeye               | <i>Hiodon alosoides</i>         | Actinopteri<br>(Neopterygii) | Teleostei  | Osteoglossomorpha<br>(3) | Hiodontiformes    | Hiodontidae      | Available Dataverse                |
| Old Calabar mormyrid  | <i>Paramormyrops kingsleyae</i> | Actinopteri<br>(Neopterygii) | Teleostei  | Osteoglossomorpha<br>(3) | Osteoglossiformes | Mormyridae       | GCA_002872115.1                    |
| Arapaima              | <i>Arapaima gigas</i>           | Actinopteri<br>(Neopterygii) | Teleostei  | Osteoglossomorpha<br>(3) | Osteoglossiformes | Osteoglossidae   | GCA_007844225.1                    |
| Asian arowana         | <i>Scleropages formosus</i>     | Actinopteri                  | Teleostei  | Osteoglossomorpha        | Osteoglossiformes | Osteoglossidae   | GCA_001624265.1                    |

|                     |                               |                              |           |                 |                    |                  |                          |
|---------------------|-------------------------------|------------------------------|-----------|-----------------|--------------------|------------------|--------------------------|
|                     |                               | (Neopterygii)                |           | (3)             |                    |                  |                          |
| Mexican tetra       | <i>Astyanax mexicanus</i>     | Actinopteri<br>(Neopterygii) | Teleostei | Otomorpha       | Characiformes      | Characidae       | GCA_000372685.2          |
| Zebrafish           | <i>Danio rerio</i>            | Actinopteri<br>(Neopterygii) | Teleostei | Otomorpha       | Cypriniformes      | Danionidae       | GCA_000002035.4          |
| Tetraodon           | <i>Tetraodon nigroviridis</i> | Actinopteri<br>(Neopterygii) | Teleostei | Euteleosteorpha | Tetraodontiformes  | Tetraodontidae   | Ensembl TETRAODON<br>8.0 |
| Fugu                | <i>Takifugu rubripes</i>      | Actinopteri<br>(Neopterygii) | Teleostei | Euteleosteorpha | Tetraodontiformes  | Tetraodontidae   | GCA_000180615.2          |
| Stickleback         | <i>Gasterosteus aculeatus</i> | Actinopteri<br>(Neopterygii) | Teleostei | Euteleosteorpha | Perciformes        | Gasterosteidae   | Ensembl broad S1         |
| Channel bull blenny | <i>Cottoperca gobio</i>       | Actinopteri<br>(Neopterygii) | Teleostei | Euteleosteorpha | Perciformes        | Bovichtidae      | GCF_900634415.1          |
| Yellow perch        | <i>Perca flavescens</i>       | Actinopteri<br>(Neopterygii) | Teleostei | Euteleosteorpha | Perciformes        | Percidae         | GCF_004354835.1          |
| Medaka              | <i>Oryzias latipes</i>        | Actinopteri<br>(Neopterygii) | Teleostei | Euteleosteorpha | Atheriniformes     | Adrianichthyidae | GCA_002234675.1          |
| Platy               | <i>Xiphophorus maculatus</i>  | Actinopteri<br>(Neopterygii) | Teleostei | Euteleosteorpha | Cyprinodontiformes | Poeciliidae      | GCA_002775205.2          |
| Amazon molly        | <i>Poecilia formosa</i>       | Actinopteri<br>(Neopterygii) | Teleostei | Euteleosteorpha | Cyprinodontiformes | Poeciliidae      | GCA_000485575.1          |

(1) & (2) not ranked according to Betancur et al., 2017 (I2); (3) = Supercohort according to Betancur et al., 2017 (I2); NA = Not applicable; Available dataverse = <https://doi.org/10.15454/GWL0GP>
